# Supplementary material
Source: Springer Nature journal article supplement (https://www.springermedizin.de/resource/supplementary/12883_2014_1054_MOESM4_ESM.pdf/9456444)

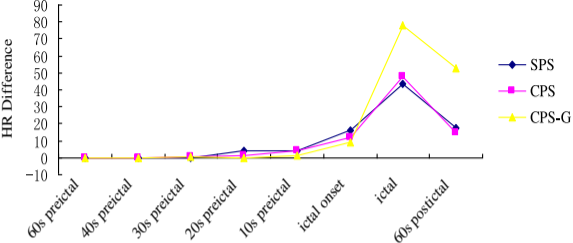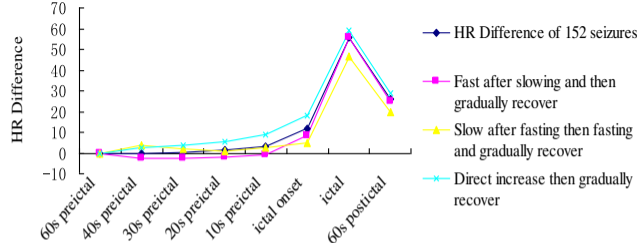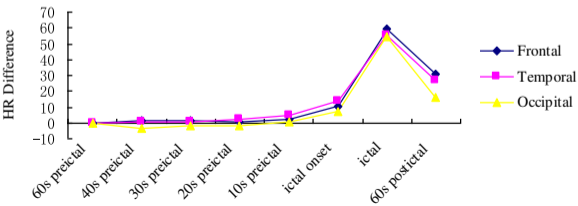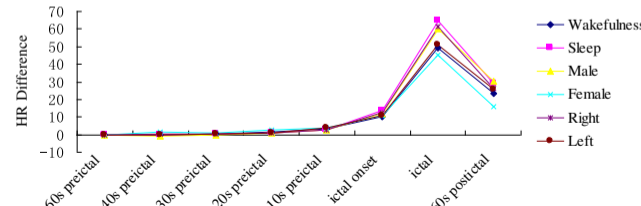

Supplement: MOESM4 [file 9456444]
